# Supplementary material for: Diatomic catalysts for Fenton and Fenton-like reactions: a promising platform for designing/regulating reaction pathways
Source: Royal Society of Chemistry journal article supplement (doi:10.1039/d3sc02872k), 2023-01-01
Supplement: d3sc02872k1.pdf [file d3sc02872k1.pdf]

## **Diatomic Catalysts for Fenton and Fenton-like Reactions: New Advances and In-Depth Insights**

Fan Mo, Qixing Zhou\*, Chenghao Li, Zongxin Tao, Zelin Hou, Tong Zheng, Qi Wang,  
Shaohu Ouyang, Sihui Zhan

Key Laboratory of Pollution Processes and Environmental Criteria (Ministry of Education)/Tianjin Key Laboratory of Environmental Remediation and Pollution Control, Carbon Neutrality Interdisciplinary Science Center, College of Environmental Science and Engineering, Nankai University, Tianjin 300350, China.

To whom correspondence may be addressed. Email: [zhouqx@nankai.edu.cn](mailto:zhouqx@nankai.edu.cn) (Q. Zhou).

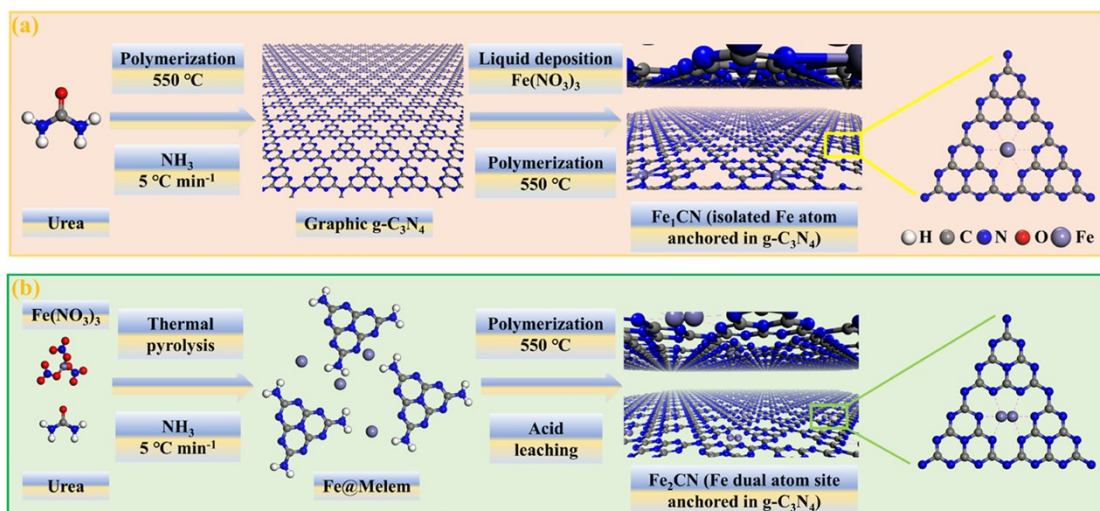

**Fig. S1.** Critical synthesis process for (a)  $\text{Fe}_1\text{CN}$  and (b)  $\text{Fe}_2\text{CN}$ . Reprinted (adapted) with permission from (1). Copyright 2022 ACS.

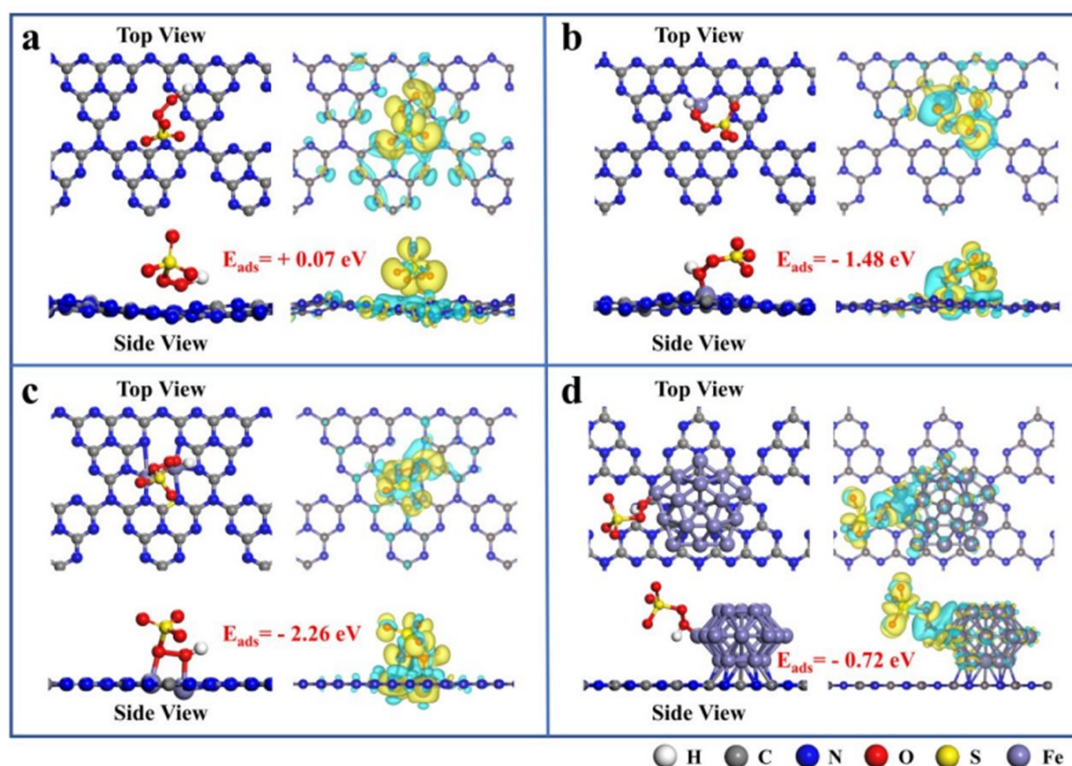

**Fig. S2.** The adsorption configuration and the charge density difference of PMS adsorbed on (a)  $\text{g-C}_3\text{N}_4$ , (b)  $\text{Fe}_1\text{CN}$ , (c)  $\text{Fe}_2\text{CN}$ , and (d)  $\text{Fe}_n\text{CN}$ . The light yellow and light blue isosurfaces represent electron accumulation and depletion, respectively. Reprinted (adapted) with permission from (1). Copyright 2022 ACS.

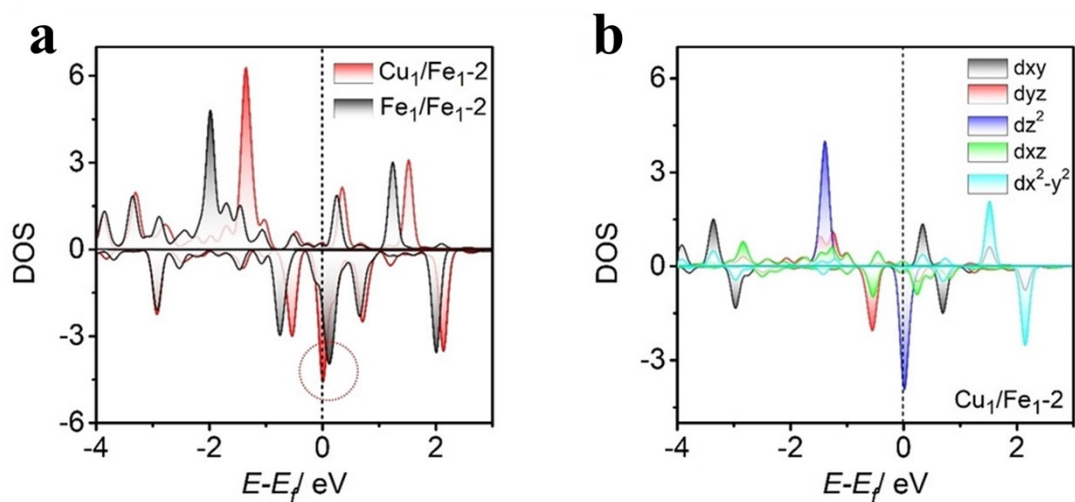

**Fig. S3.** (a) Fe 3d DOS of Fe<sub>1</sub>/Fe<sub>1-2</sub> and Cu<sub>1</sub>/Fe<sub>1-2</sub>. (b) DOS of the five Fe 3d orbitals in Cu<sub>1</sub>/Fe<sub>1-2</sub>. Reprinted (adapted) with permission from (2). Copyright 2022 ACS.

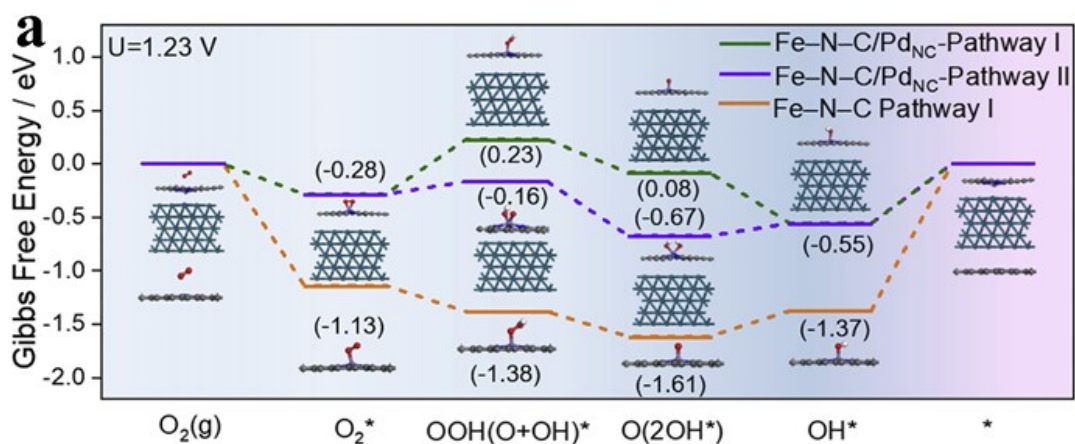

**Fig. S4 (Corresponding to Fig. 3a).** (a) Gibbs free energy diagram of ORR after the consideration of solvent effect. Reprinted (adapted) with permission from (3). Copyright 2022 Cell Press.

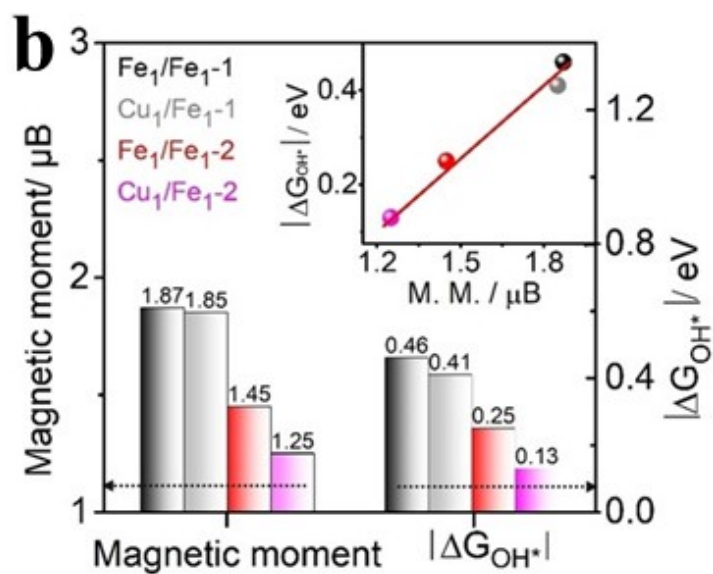

**Fig. S5 (Corresponding to Fig. 3b).** Comparison of magnetic moment and  $\Delta G_{OH^*}$ . Reprinted (adapted) with permission from (2). Copyright 2022 Wiley.

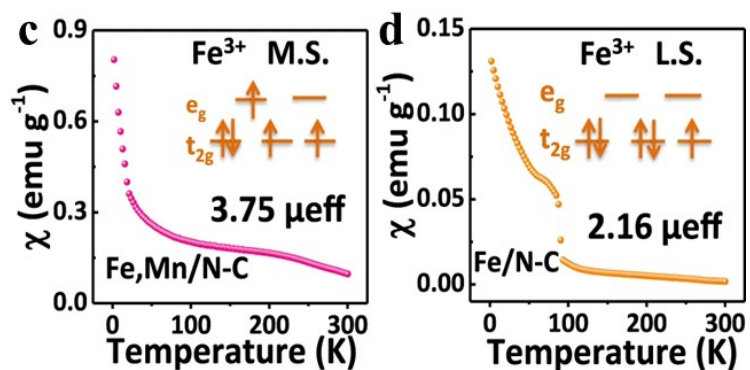

**Fig. S6 (corresponding to Fig. 3c and d).** Magnetic susceptibility of (c) Fe-Mn/NC, (d) Fe/NC (M.S. represents medium-spin, L.S. represents low-spin), with permission from (4) copyright 2021 Springer Nature.

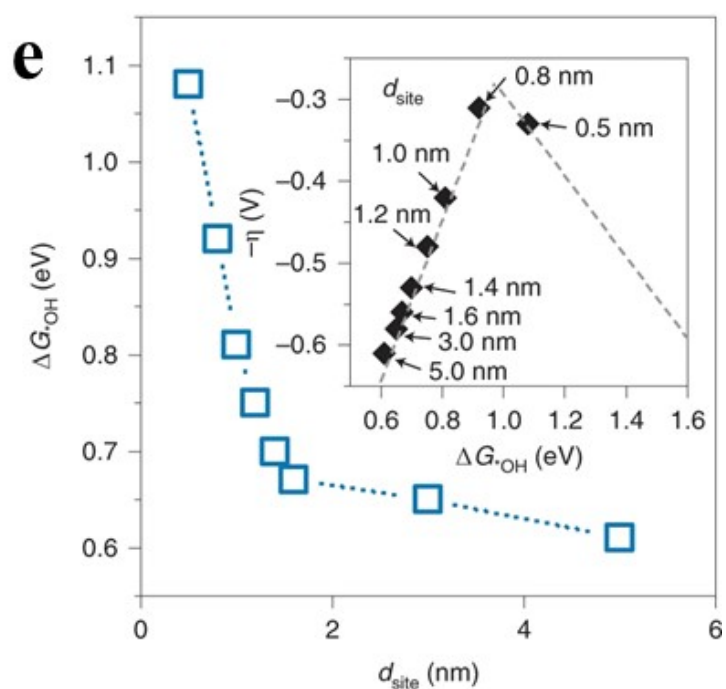

**Fig. S7 (corresponding to Fig. 3e).** The  $d_{\text{site}}$ -dependent  $\Delta G_{\text{OH}}^*$  obtained by DFT calculations. Inset: volcano plot of calculated overpotentials for the ORR against  $\Delta G_{\text{OH}}^*$ . Reprinted (adapted) with permission from (5). Copyright 2021 Springer Nature.

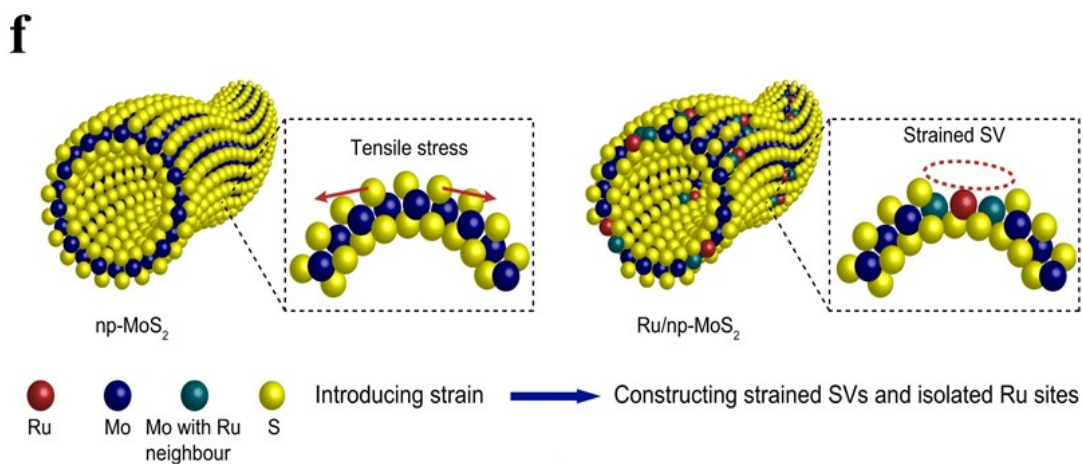

**Fig. S8 (corresponding to Fig. 3f).** Illustration of the construction Ru/np-MoS<sub>2</sub>. Reprinted (adapted) with permission from (6). Copyright 2021 Springer Nature.



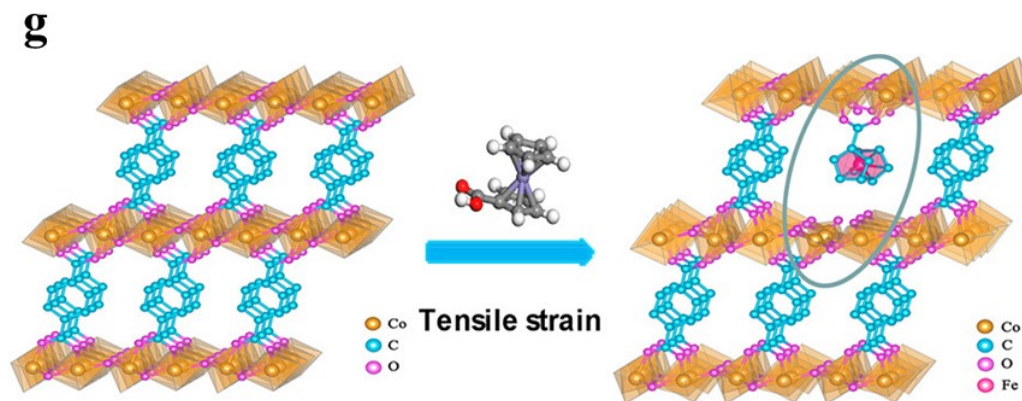

**Fig. S9 (corresponding to Fig. 3g).** (g) Crystal structures of CoBDC and CoBDC FcCA models obtained from DFT simulations. The microreactor composed of directly coordinated with carboxyl oxygen atom of FcCA (Co1), unsaturated coordinative Co2, together with FcCA linker labeled by circle. Reprinted (adapted) with permission from (7). Copyright 2021 ACS.

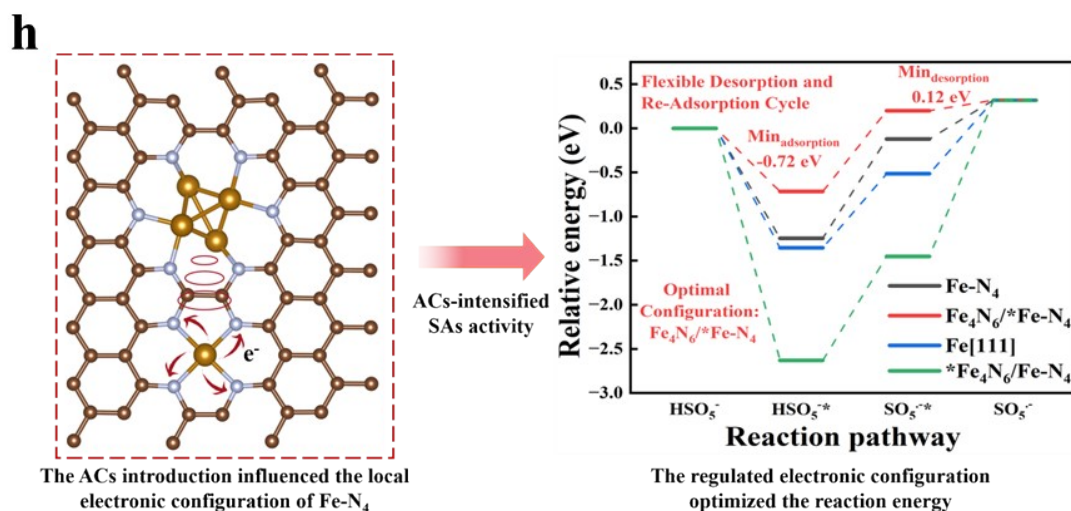

**Fig. S10 (corresponding to Fig. 3h).** The regulatory role of Fe ACs on the Fe SAs-mediated PMS oxidation reaction. Reprinted (adapted) with permission from (8). Copyright 2023 PNAS.

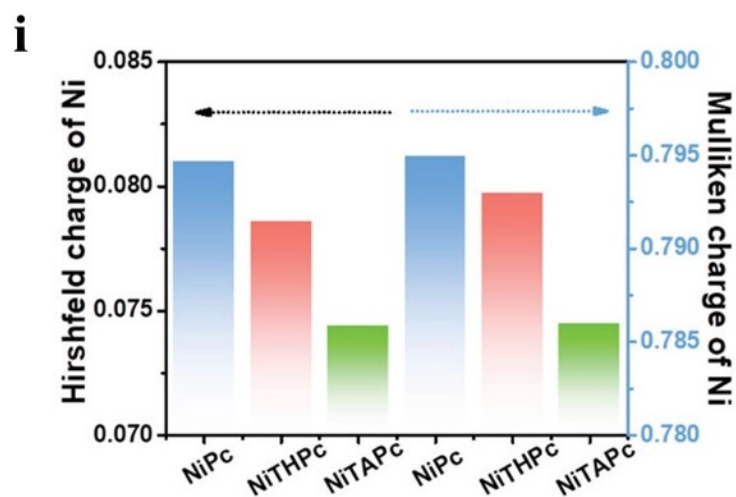

**Fig. S11 (corresponding to Fig. 3i).** (i) Hirshfeld and Mulliken charges of Ni atom in NiPc, NiTHPc, and NiTAPc. Reprinted (adapted) with permission from (9). Copyright 2021 Wiley.

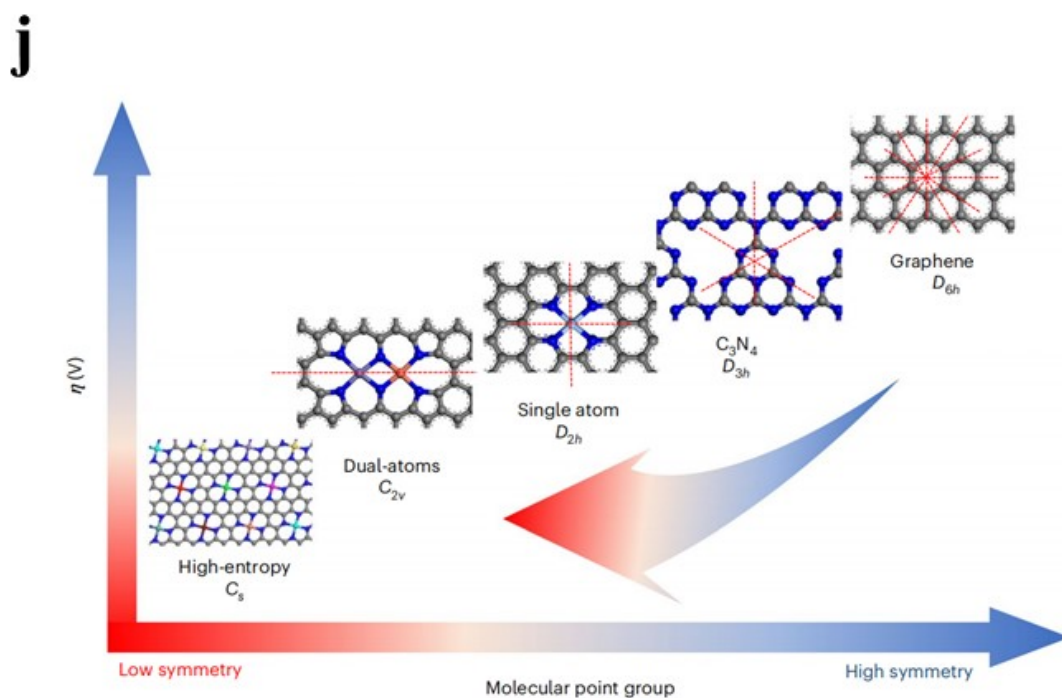

**Fig. S12 (corresponding to Fig. 3j).** (j) The relationship between symmetry and electrocatalytic performance, with permission from (10) copyright 2023 Springer Nature.

## Equation

OER in alkaline solution (ORR is the reverse reaction of OER)

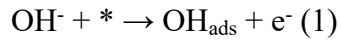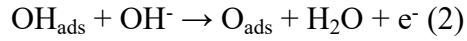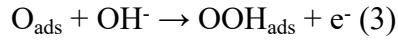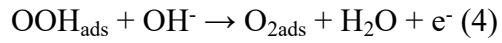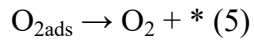

OER in acidic solution (ORR is the reverse reaction of OER)

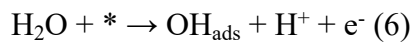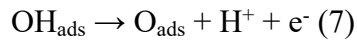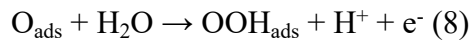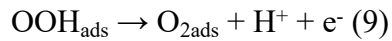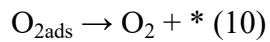

HER in alkaline solution

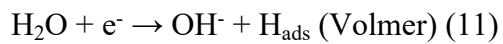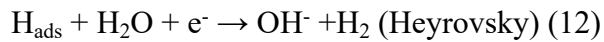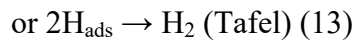

HER in acidic solution

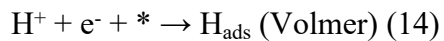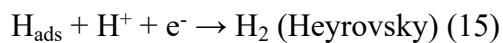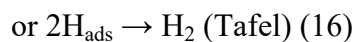



## References

1. J. Li *et al.*, Modulating the electronic coordination configuration and d-band center in homodiatom Fe<sub>2</sub>N<sub>6</sub> catalysts for enhanced peroxymonosulfate activation. *ACS Appl. Mater. Interfaces* **14**, 37865-37877 (2022).
2. T. He *et al.*, Theory-guided regulation of FeN<sub>4</sub> spin state by neighboring Cu atoms for enhanced oxygen reduction electrocatalysis in flexible metal–air batteries. *Angew. Chem., Int. Ed. Engl.* **134**, e202201007 (2022).
3. X. Wei *et al.*, Tuning the spin state of Fe single atoms by Pd nanoclusters enables robust oxygen reduction with dissociative pathway. *Chem* **9**, 181-197 (2023).
4. G. Yang *et al.*, Regulating Fe-spin state by atomically dispersed Mn-N in Fe-N-C catalysts with high oxygen reduction activity. *Nat. Commun.* **12**, 1734 (2021).
5. Z. Jin *et al.*, Understanding the inter-site distance effect in single-atom catalysts for oxygen electroreduction. *Nat. Catal.* **4**, 615-622 (2021).
6. K. Jiang *et al.*, Rational strain engineering of single-atom ruthenium on nanoporous MoS(2) for highly efficient hydrogen evolution. *Nat. Commun.* **12**, 1687 (2021).
7. F. He *et al.*, Metal-organic frameworks with assembled bifunctional microreactor for charge modulation and strain generation toward enhanced oxygen electrocatalysis. *ACS Nano* **16**, 9523-9534 (2022).
8. F. Mo *et al.*, The optimized Fenton-like activity of Fe single-atom sites by Fe atomic clusters-mediated electronic configuration modulation. *Proc. Natl. Acad. Sci. U. S. A.* **120**, e2300281120 (2023).
9. K. Chen *et al.*, Ligand engineering in nickel phthalocyanine to boost the electrocatalytic reduction of CO<sub>2</sub>. *Adv. Funct. Mater.* **32**, 2111322 (2021).
10. X. Lei *et al.*, High-entropy single-atom activated carbon catalysts for sustainable oxygen electrocatalysis. *Nat. Sustain.* 10.1038/s41893-023-01101-z (2023).
